# Supplementary material for: Antibody Responses to SARS-CoV-2 Infection—Comparative Determination of Seroprevalence in Two High-Throughput Assays versus a Sensitive Spike Protein ELISA
Source: MDPI journal article supplement (doi:10.3390/vaccines9111310), 2021-11-11
Supplement: s1 [file s1]

## 1. Supplementary Data

Table S1. Summary of performance characterizes of each immunoassay as provided by the manufacturer.

| Assay and analyser used                                   | Viral target and antibody type      | Sample type                                                                           | Sensitivity (95% CI) on samples taken ≥14 days post-symptom onset/post-RT-PCR positive, [sample numbers] | Specificity (95% CI), number of samples | Manufactures threshold value         |
|-----------------------------------------------------------|-------------------------------------|---------------------------------------------------------------------------------------|----------------------------------------------------------------------------------------------------------|-----------------------------------------|--------------------------------------|
| Abbott SARS-CoV-2 Immunoassay, Architect i2000SR          | Nucleocapsid protein, IgG           | Serum, serum separator tube and plasma.                                               | 100% (95.89-100), [88]                                                                                   | 99.63% (99.05, 99.90), [1070]           | Negative: <1.4<br>Positive: ≥1.4     |
| Roche Elecsys® Anti-SARS-CoV-2, Cobas e 411               | Nucleocapsid protein, IgG           | Serum collected using standard sampling tubes. Li-heparin, K2-EDTA and K3-EDTA Plasma | 99.5% (97.0-100%), [496]                                                                                 | 99.80% (99.69, 99.89%), [10,453]        | Non-reactive: <1.0<br>Reactive: ≥1.0 |
| The Binding Site Anti IgG/A/M SARS-CoV-2 ELISA, Dynex DS2 | S1/S2 spike protein, Total antibody | Serum, serum separating tube.                                                         | 98.6 % (92.6-100), [162]                                                                                 | 98.3 (96.4-99.4), [707].                | Negative: <1.0<br>Positive: ≥1.0,    |
